# Supplementary material for: Relation of Disaster Exposure With Maternal Characteristics and Obstetric Outcomes: the Tohoku Medical Megabank Project Birth and Three-Generation Cohort Study
Source: PubMed Central journal article supplement (PMC9909171; doi:10.2188/jea.je20210052), 2023-03-05
Supplement: je-33-127-s001.pdf [file je-33-127-s001.pdf]

**eTable 1.** Comparison of basic characteristics and outcomes between eligible and not eligible participants for the analysis

|                                                              | Not eligible<br>n=8,998 |      | Eligible<br>n=13,148 |      | <i>P</i> |
|--------------------------------------------------------------|-------------------------|------|----------------------|------|----------|
|                                                              | n                       | %/SD | n                    | %/SD |          |
| Age, ≥35 years                                               | 1,984                   | 22.3 | 3,554                | 27.1 | <0.0001  |
| Primiparous                                                  | 4,427                   | 49.4 | 6,326                | 48.2 | 0.1      |
| Pre-pregnancy BMI                                            |                         |      |                      |      | <0.0001  |
| <18.5 kg/m <sup>2</sup>                                      | 2,177                   | 24.2 | 2,088                | 15.9 |          |
| ≥25 kg/m <sup>2</sup>                                        | 1,031                   | 11.5 | 1,444                | 11.0 |          |
| Fertility treatments (Yes)                                   | 711                     | 8.7  | 1,491                | 11.4 | <0.0001  |
| Multiple pregnancy (Yes)                                     | 128                     | 2.1  | 177                  | 2.0  | 0.8      |
| Smoking during the first trimester                           |                         |      |                      |      | <0.0001  |
| Current smoker                                               | 300                     | 3.7  | 238                  | 1.8  |          |
| Stopped after becoming pregnant                              | 1,508                   | 18.5 | 1,549                | 11.9 |          |
| Stopped before pregnancy                                     | 1,835                   | 22.5 | 3,101                | 23.8 |          |
| Never                                                        | 4,522                   | 55.4 | 8,138                | 62.5 |          |
| Drinking during the first trimester                          |                         |      |                      |      | 0.001    |
| Current drinker                                              | 1,522                   | 18.6 | 2,675                | 20.5 |          |
| Stopped before or during pregnancy                           | 2,912                   | 35.6 | 4,424                | 33.9 |          |
| Never                                                        | 3,743                   | 45.8 | 5,935                | 45.5 |          |
| Strong activity once or more per week before pregnancy (Yes) | 1,350                   | 16.5 | 2,094                | 16.1 | 0.4      |

|                                     |       |      |        |      |         |
|-------------------------------------|-------|------|--------|------|---------|
| Sleeping pills                      |       |      |        |      | 0.2     |
| Never use                           | 8,109 | 99.0 | 12,953 | 99.3 |         |
| Less than once per week             | 21    | 0.3  | 20     | 0.2  |         |
| Once or more per week               | 58    | 0.7  | 78     | 0.6  |         |
| K6 score, $\geq 13$                 | 501   | 6.2  | 733    | 5.6  | 0.1     |
| Household income (Japanese yen)     |       |      |        |      | <0.0001 |
| <4 million                          | 2,883 | 39.3 | 4,337  | 35.1 |         |
| $\geq 4$ million, <8 million        | 3,618 | 49.4 | 6,432  | 52.0 |         |
| $\geq 8$ million                    | 828   | 11.3 | 1,605  | 13.0 |         |
| Living with Partner                 | 7,325 | 81.4 | 12,030 | 91.5 | <0.0001 |
| Living with Maternal parents        | 1,034 | 11.5 | 1,263  | 9.6  | <0.0001 |
| Living with Paternal parents        | 1,213 | 13.5 | 1,866  | 14.2 | 0.1     |
| Family history of hypertension      | 28    | 0.3  | 4,913  | 37.4 | <0.0001 |
| Family history of diabetes mellitus | 8     | 0.1  | 1,666  | 12.7 | <0.0001 |
| Year of participation               |       |      |        |      | <0.0001 |
| 2013                                | 255   | 2.8  | 633    | 4.8  |         |
| 2014                                | 2,476 | 27.5 | 4,149  | 31.6 |         |
| 2015                                | 3,642 | 40.5 | 4,886  | 37.2 |         |
| 2016                                | 2,617 | 29.1 | 3,465  | 26.4 |         |
| 2017                                | 8     | 0.1  | 15     | 0.1  |         |
| Maternal outcomes                   |       |      |        |      |         |
| Hypertensive disorders of pregnancy | 1,010 | 11.2 | 1,422  | 10.8 | 0.3     |
| Gestational diabetes mellitus       | 261   | 2.9  | 331    | 2.5  | 0.08    |

Child outcomes

|                                          |         |       |         |       |         |
|------------------------------------------|---------|-------|---------|-------|---------|
| Newborn birth weight, g                  | 2,972.5 | 559.8 | 3,013.9 | 438.5 | <0.0001 |
| Newborn with low birth weight (<2,500 g) | 1,309   | 14.6  | 1,236   | 9.4   | <0.0001 |
| Gestational weeks                        | 38.3    | 3.2   | 38.7    | 1.8   | <0.0001 |
| Preterm birth (<37 gestational weeks)    | 1,055   | 11.7  | 804     | 6.1   | <0.0001 |

BMI, body mass index; K6, Kessler 6 Psychological Distress Scale; SD, standard deviation.

The chi-squared test for categorical variables and the Student's t test for continuous variables were used for the comparison.
